# Supplementary material for: Fatty acids derived from the probiotic Lacticaseibacillus rhamnosus HA-114 suppress age-dependent neurodegeneration
Source: PubMed Central journal article supplement (PMC9729297; doi:10.1038/s42003-022-04295-8), 2022-12-07
Supplement: 42003_2022_4295_MOESM2_ESM.pdf [file 42003_2022_4295_MOESM2_ESM.pdf]

## Supplementary information for

### Fatty acids derived from the probiotic *Lactobacillus rhamnosus* HA-114 suppress age-dependent neurodegeneration

**Authors:** Audrey Labarre<sup>1, 2</sup>, Ericka Guitard<sup>1, 2</sup>, Gilles Tossing<sup>1, 2</sup>, Anik Forest<sup>3</sup>, Eric Bareke<sup>2</sup>, Marjorie Labrecque<sup>2,4</sup>, Martine Tétreault<sup>1,2</sup>, Matthieu Ruiz<sup>3,5</sup> & J Alex Parker<sup>1, 2\*</sup>

#### **Affiliations:**

<sup>1</sup> Département de neurosciences, Université de Montréal, Montréal, Canada

<sup>2</sup> Centre de recherche du centre hospitalier de l'Université de Montréal (CRCHUM), Montréal, Canada.

<sup>3</sup> Centre de recherche, Institut de Cardiologie de Montréal, Montréal, Québec, Canada.

<sup>4</sup> Département de biochimie, Université de Montréal, Montréal, Canada

<sup>5</sup> Département de nutrition, Université de Montréal, Montréal, Canada

\*Correspondence to: [ja.parker@umontreal.ca](mailto:ja.parker@umontreal.ca)

## Contents

Supplementary figure 1 Probiotics screen identified *Lacticaseibacillus rhamnosus* HA-114 as a neuroprotective bacterial strain.

Supplementary figure 2. *Lacticaseibacillus rhamnosus* HA-114 is the only neuroprotective *rhamnosus* strain but does not extend lifespan

Supplementary figure 3. *Lacticaseibacillus rhamnosus* HA-114 prevents damage from chronic oxidative stress.

Supplementary figure 4. HA-114 does not require classic stress and metabolic pathways in FUS<sup>S57Δ</sup> worms for neuroprotection.

Supplementary figure 5. HA-114 does not activate classic stress pathways in *C. elegans*

Supplementary figure 6. *Bifidobacterium animalis subsp. lactis* B94 induces differential genes expression in *C. elegans*.

Supplementary figure 7. HA-114 modulate *acdH-1* expression through aging in mutant FUS worms.

Supplementary figure 8. *acdH-10* is not required for neuroprotection provided by HA-114 in FUS<sup>S57Δ</sup> worms.

Supplementary figure 9. *kat-1* and *elo-6* are essential for neuroprotection provided by HA-114 in TDP-43<sup>A315T</sup> ALS model.

Supplementary figure 10. Simplified pathway of fatty acids metabolism and  $\beta$ -oxidation in *C. elegans* and *H. sapiens*.

Supplementary figure 11. *acdH-1* is activated by HA-114' fatty acids.

Supplementary figure 12. Modulating *acdH-1* pathway partially affects HA-114 neuroprotective effect.

Supplementary figure 13. Etomoxir does not cause oxidative stress in *C. elegans*.

Supplementary figure 13. Etomoxir does not cause oxidative stress in *C. elegans*.

Supplementary figure 14: Genes associated with  $\beta$ -oxidation are differentially expressed in the cerebellum and the frontal cortex of c9ALS patients.

Supplementary figure 15. Fatty acids from HA-114 modulate lipid accumulation in worm age-dependent neurodegeneration models.

Supplementary figure 16. Free fatty acids (FFA) annotated from OP50, HA-114 and R0011 bacterial strains.

**Supplementary Table 1. List of upregulated genes in N2 worms fed with HA-114 (compared to OP50)**

**Supplementary Table 2: List of downregulated genes in N2 worms fed with HA-114 (compared to OP50)**

**Supplementary Table 3: List of upregulated genes in N2 worms fed with B94 (compared to OP50)**

**Supplementary Table 4: List of downregulated genes in N2 worms fed with B94 (compared to OP50)**

**Supplementary Table 5: List of oligo sequences used for genotyping**

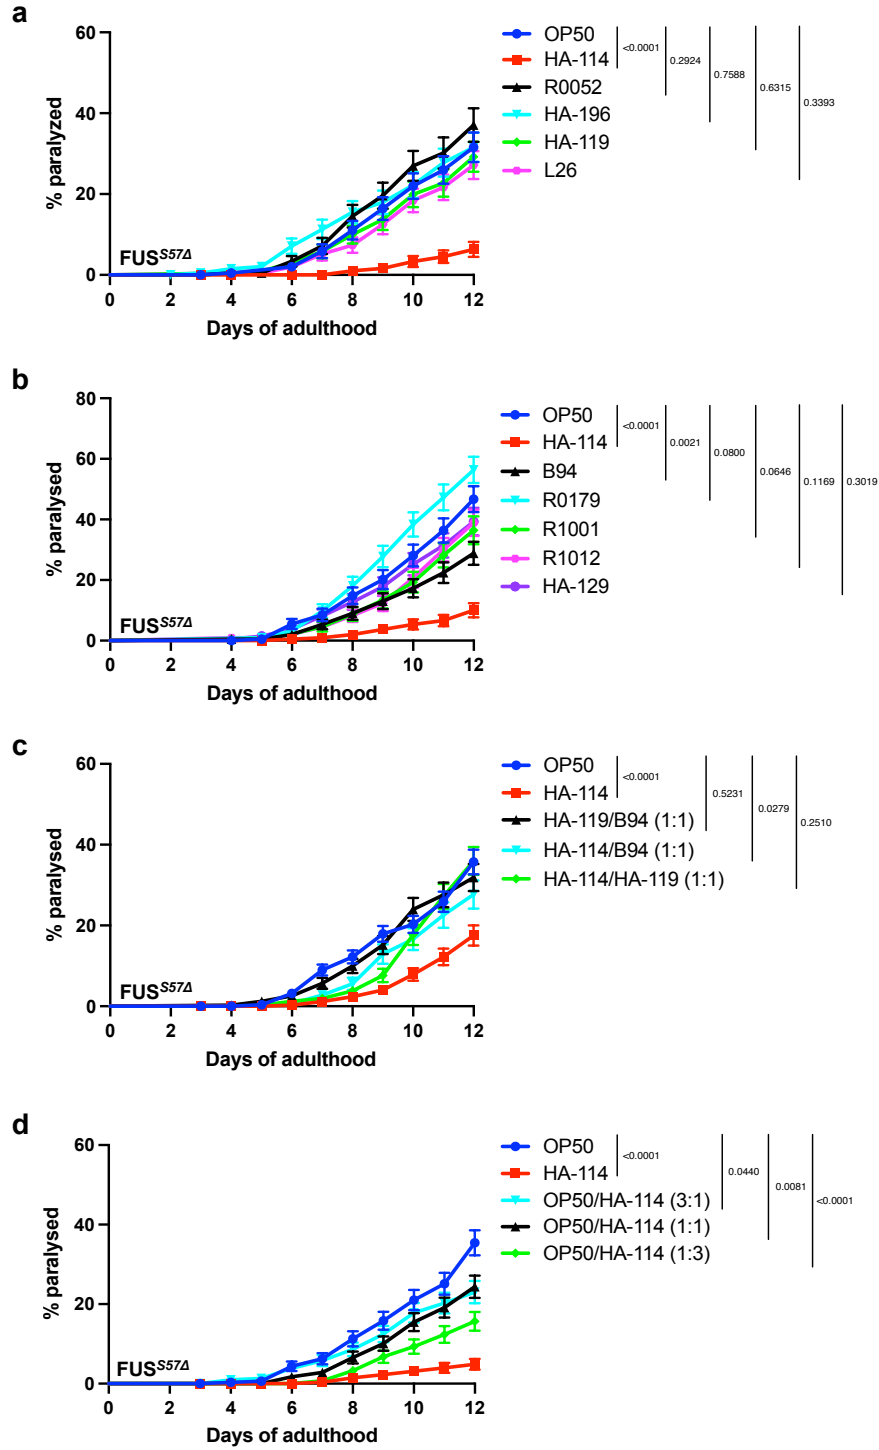

**Supplementary figure 1. Probiotics screen identified *Lacticaseibacillus rhamnosus* HA-114 as a neuroprotective bacterial strain.** Transgenics were monitored from the adult stage, scored daily for paralysis. (a) FUS<sup>S57Δ</sup> worms fed with *L. helveticus* R0052, *L. paracasei* HA-196, *L. plantarum* HA-119 or *L. casei* L26 have the same paralysis rate as the worms fed with OP50, while worms fed with *L. rhamnosus* HA-114 showed less paralysis. (b) Transgenic animals fed with either, *B. subtilis* R0179, *P. acidilactici* R1001, *L. plantarum* R1012 or *B. breve* HA-129 do not show any differences in paralysis rates when compared to animals fed with OP50. Animals fed with *B. animalis subsp. lactis* B94 showed less paralysis than the ones fed with OP50, but showed more paralysis than animals supplemented with HA-114. (c) HA-114/B94 (1:1) is the only probiotic blend preventing paralysis in FUS<sup>S57Δ</sup> worms, at lesser extent than HA-114 alone. (d) Worms fed with blends with higher concentrations of HA-114, compared to OP50, showed less paralysis compared to transgenics expressing mutant FUS fed with OP50 alone. For paralysis (panels a-d) curves were generated and compared using the log-rank (Mantel–Cox) test. Panel a: OP50 n=211; HA-114 n=212; R0052 n=211; HA-196 n=210; HA-119 n=213; L26 n=210; . Panel b: OP50 n=210; HA-114 n=211; R0179 n=210; R1001 n=211; R1012 n=213; HA-129 n=206; B94 n=213. Panel c: OP50 n= 590; HA-114 n=382; HA-119/B94 (1:1) n=351; HA-114/B94 (1:1) n=361; HA-114/HA-119 (1:1) n=359. Panel d: OP50 n=325; HA-114 n=314; OP50/HA-114 (3:1) n= 315; OP50/HA-114 (1:1) n=312; OP50/HA-114 (1:3) n=314.

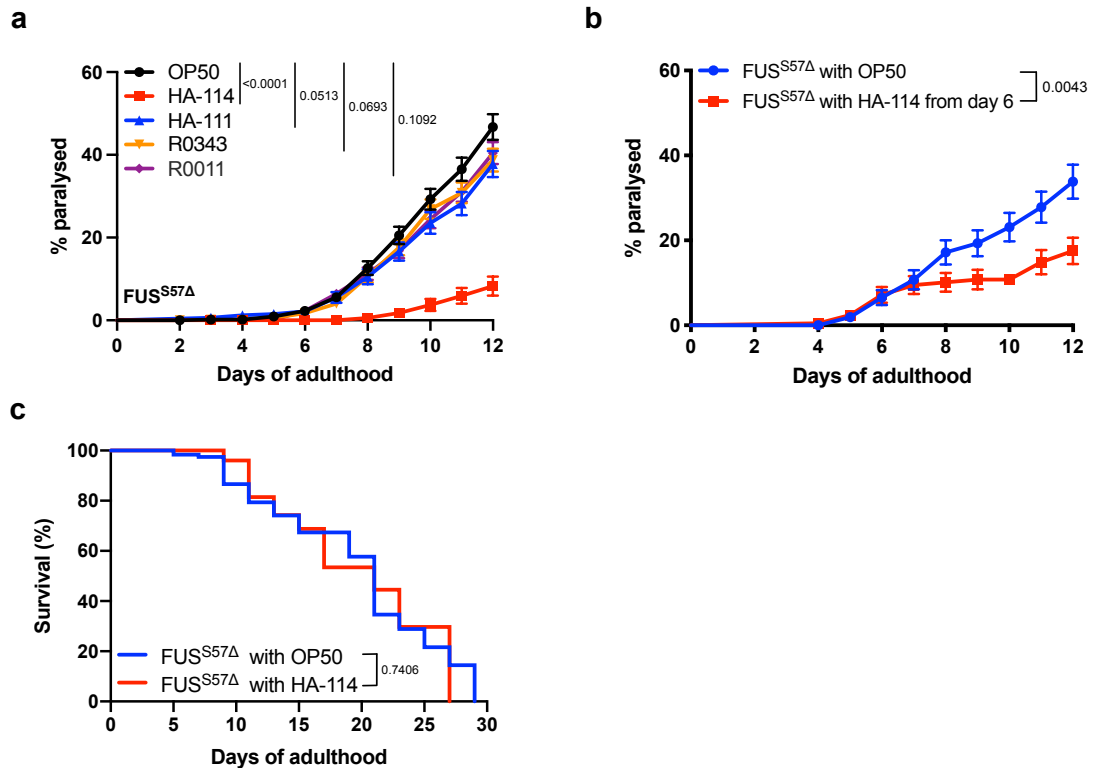

**Supplementary figure 2. *Lacticaseibacillus rhamnosus* HA-114 is the only neuroprotective *rhamnosus* strain but does not extend lifespan.** Transgenics were monitored from the adult stage, scored daily for paralysis. (a) FUS<sup>S57Δ</sup> worms fed with *L. rhamnosus* strains R0011, R0343 and HA-111 have the same paralysis rate as the worms fed with OP50. (b) Worms fed with HA-114 from day 6 (onset of paralysis) showed less paralysis compared to transgenics expressing mutant FUS fed with OP50. (c) Transgenics were monitored from the adult stage, scored every two days for mortality, and fed with control OP50 or HA-114. Mutant FUS worms fed with HA-114 do not show any lifespan extension when compared to transgenics expressing mutant FUS fed with OP50. For paralysis and lifespan assays (panels a-c) curves were generated and compared using the log-rank (Mantel–Cox) test. Panel a: OP50 n=582; HA-114 n=212; HA-111 n=331; R0343 n=585; R0011 n=588. Panel b: OP50 n=210; HA-114 from day 6 n=206. Panel c: OP50 n=126; HA-114 n=122.

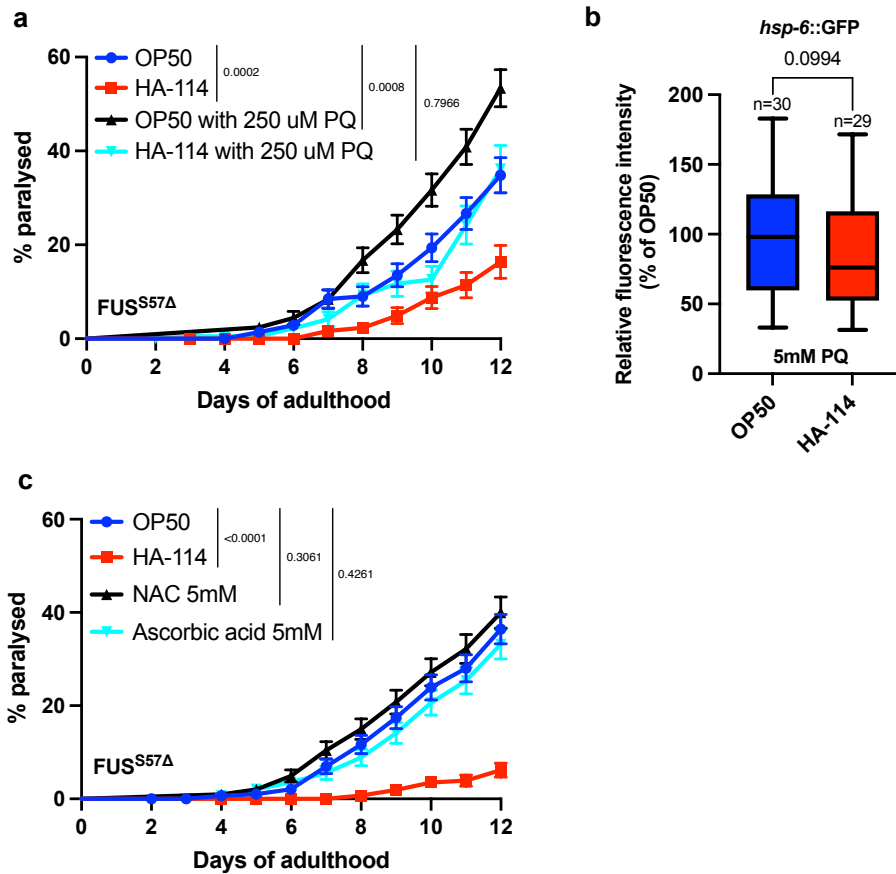

**Supplementary figure 3. *Lacticaseibacillus rhamnosus* HA-114 prevents damage from chronic oxidative stress.** (a) Transgenics were monitored from the adult stage, scored daily for paralysis. Chronic treatment of 250  $\mu$ M paraquat increased paralysis in FUS<sup>S57 $\Delta$</sup>  animals. HA-114 supplementation prevents increase of paralysis from paraquat treatment. (b) HA-114 treatment did not decrease hsp-6::GFP signal after acute oxidative stress. (c) Worms treated with either N-acetyl cysteine (NAC) or Ascorbic acid have the same paralysis rate as the worms fed with OP50. For paralysis assays (panels a & c) curves were generated and compared using the log-rank (Mantel–Cox) test. Panel a: OP50 n=216; HA-114 n=196; OP50 with 250 $\mu$ M Paraquat n=205; HA-114 with 250 $\mu$ M Paraquat n=199. Panel c: OP50 n=312; HA-114 n=315; NAC 5mM n=310; Ascorbic acid 5mM n=303. For fluorescence quantification (panel c), an unpaired

t-test was performed, and  $n$  are indicated in the figure. For boxplots, minimum, first quartile, median, third quartile, and maximum are shown.



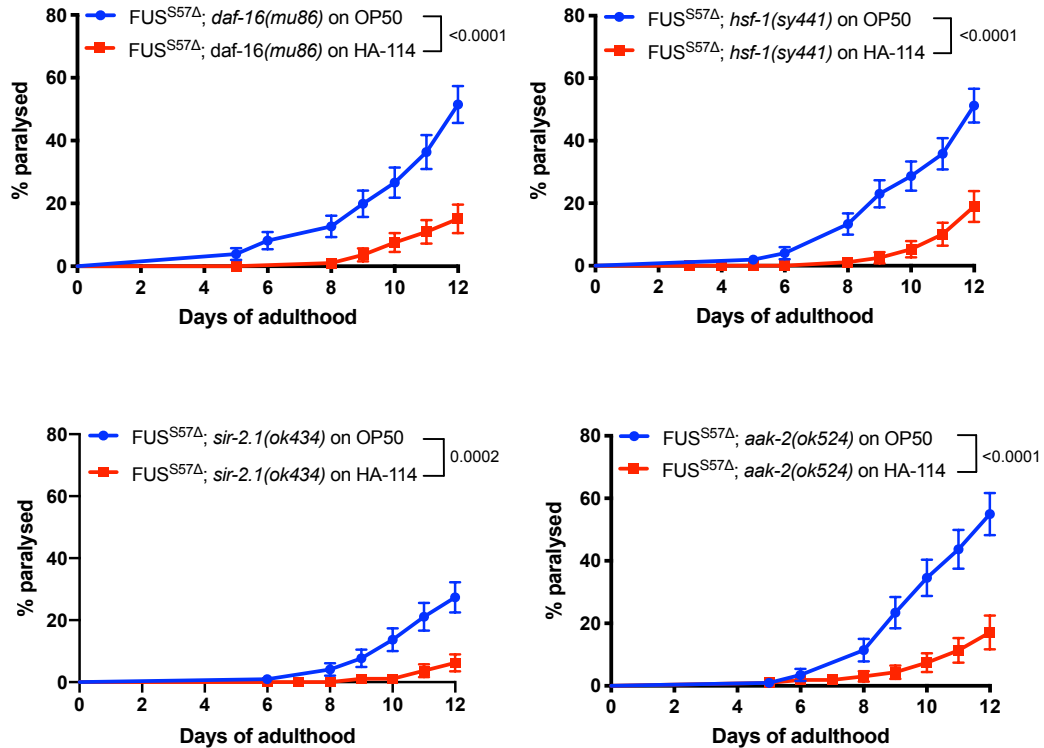

**Supplementary figure 4. HA-114 does not require classic stress and metabolic pathways in FUS<sup>S57Δ</sup> worms for neuroprotection.** Transgenics were monitored from the adult stage, scored daily for paralysis. Neuroprotection provided by *L. rhamnosus* HA-114 was unaffected by *daf-16(mu86)* deletion, nor by *hsf-1(sy441)* point mutation. Both *sir-2.1* and *aak-2* genes are not required for neuroprotection granted by HA-114 probiotics. For paralysis assays, curves were generated and compared using the log-rank (Mantel–Cox) test. FUS<sup>S57Δ</sup>; *daf-16(mu86)* on OP50 n=103; FUS<sup>S57Δ</sup>; *daf-16(mu86)* on HA-114 n=106; FUS<sup>S57Δ</sup>; *hsf-1(sy441)* on OP50 n=103; FUS<sup>S57Δ</sup>; *hsf-1(sy441)* on HA-114 n=105; FUS<sup>S57Δ</sup>; *sir-2.1(ok434)* on OP50 n=101; FUS<sup>S57Δ</sup>; *sir-2.1(ok434)* on HA-114 n=106; FUS<sup>S57Δ</sup>; *aak-2(ok524)* on OP50 n=104; FUS<sup>S57Δ</sup>; *aak-2(ok524)* on HA-114 n=107.

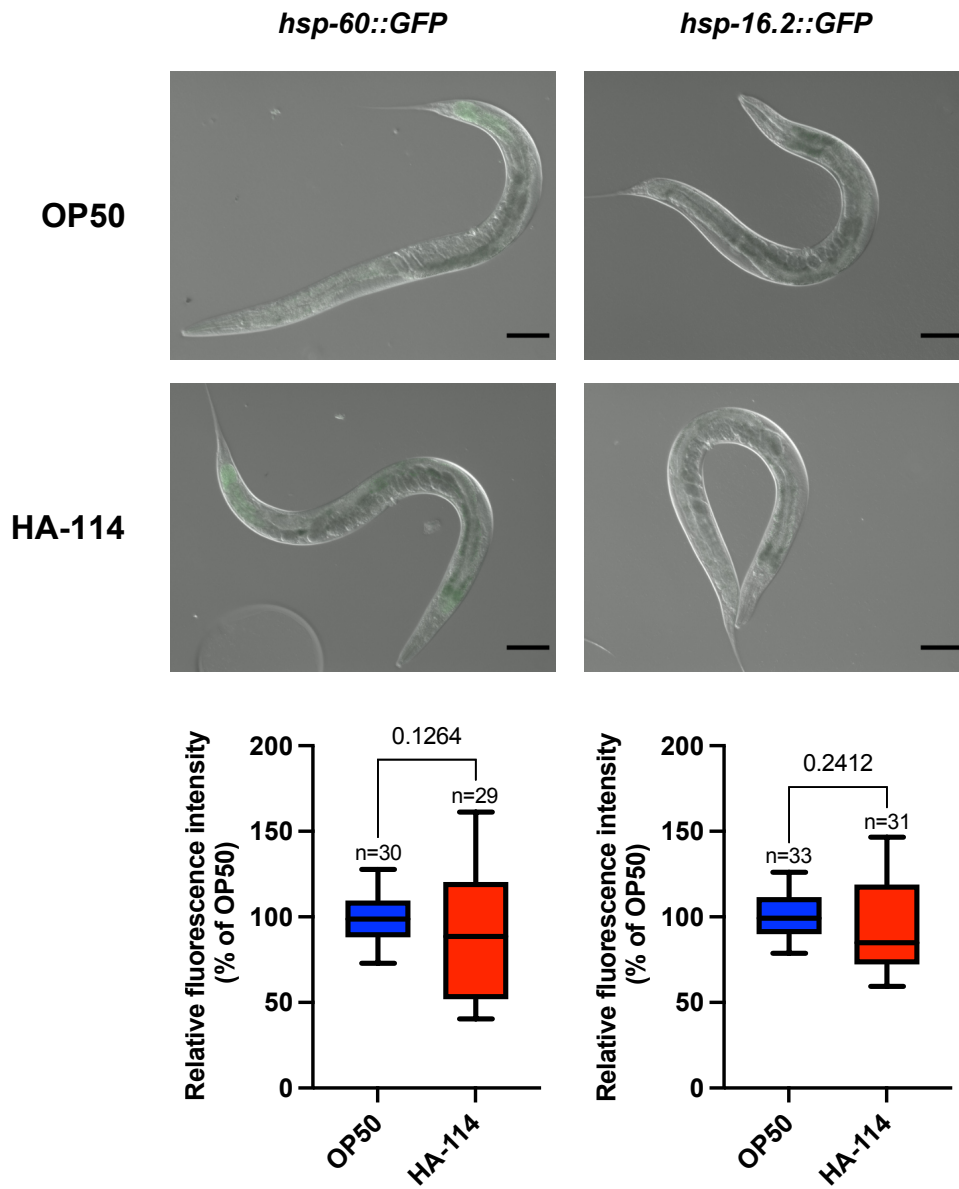

**Supplementary figure 5. HA-114 does not activate classic stress pathways in *C. elegans*.** HA-114 did not affect GFP expression of key genes of the endoplasmic reticulum unfolded protein response (UPR<sub>mito</sub>; *hsp-60*) or cytoplasmic unfolded protein response (UPR<sup>Cyt</sup>; *hsp-16.2*). For fluorescence quantifications, unpaired t-test were performed, and *n* are indicated in the figure. Scale bar = 100  $\mu$ m. For boxplots, minimum, first quartile, median, third quartile, and maximum are shown.

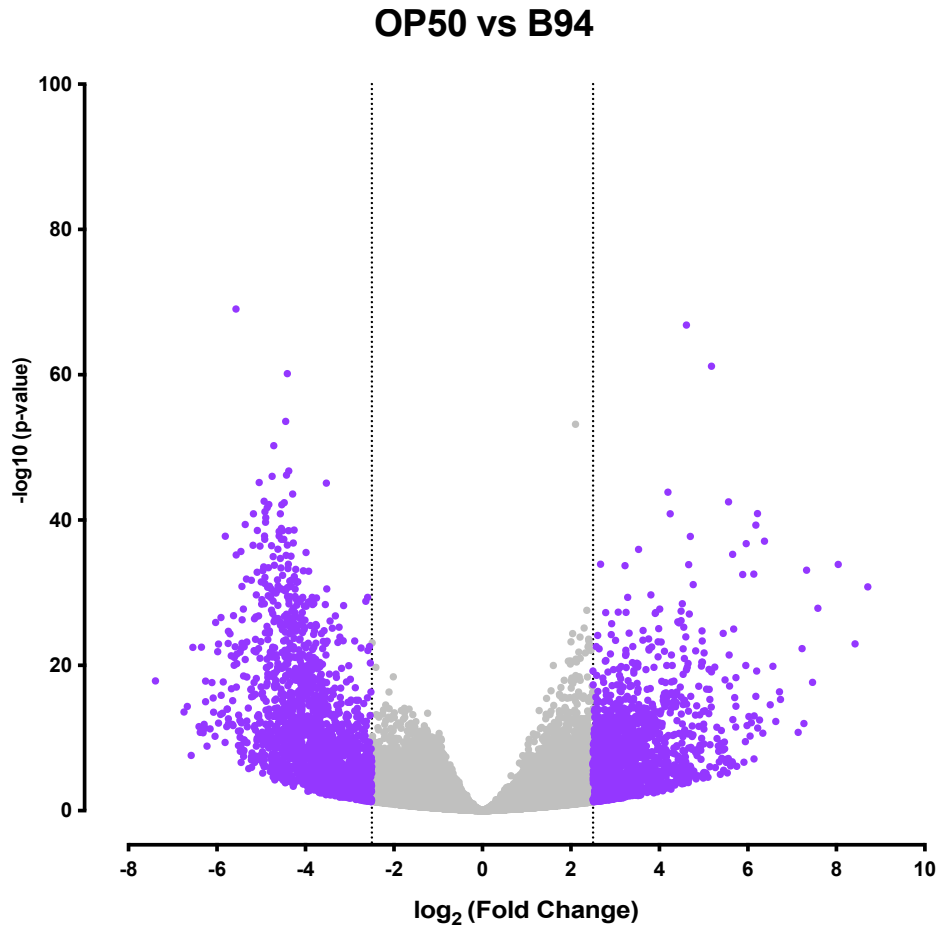

**Supplementary figure 6. *Bifidobacterium animalis subsp. lactis* B94 induces differential genes expression in *C. elegans*.** Volcano plot of RNA-Seq data of N2 worms fed with *Bifidobacterium animalis subsp. lactis* B94 and compared to worms fed with OP50. The data for all genes were plotted as log<sub>2</sub> fold change versus -log<sub>10</sub> of the adjusted p-value. Data: GEO accession: GSE189988; SRA study:SRP348888.

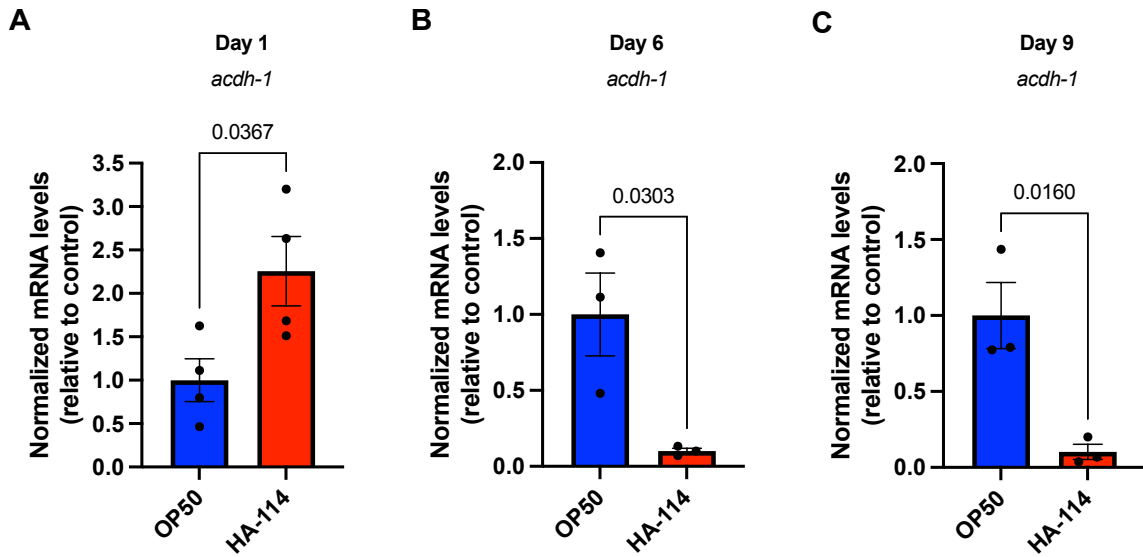

**Supplementary figure 7. HA-114 modulate *acd-1* expression through aging in mutant FUS worms.** (a) mRNA expression of *acd-1* was significantly increased in day 1 FUS<sup>S57Δ</sup> worms fed with HA-114 when compared to animals fed with OP50. HA-114 treatment decreased *acd-1* expression through aging, at day 6 (b) and day 9 (c). For TaqMan assays (panels a-c), an unpaired t-test was performed. Panel a: n=4 per condition. Panel b: n=3 per condition. Panel c: n=3 per condition. Data are presented as mean ± SEM.

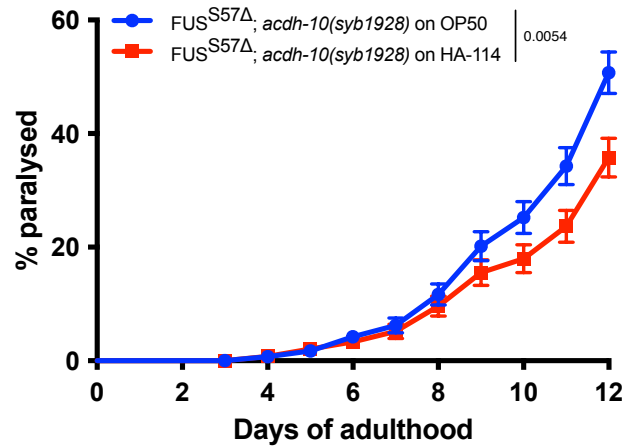

**Supplementary figure 8. *acdh-10* is not required for neuroprotection provided by HA-114 in FUS<sup>S57Δ</sup> worms.** Transgenics were monitored from the adult stage, scored daily for paralysis. Neuroprotection provided by *L. rhamnosus* HA-114 was unaffected by *acdh-10(syb1928)* nonsense mutation. Curves were generated and compared using the log-rank (Mantel–Cox) test. FUS<sup>S57Δ</sup>; *acdh-10(syb1928)* on OP50 n=419; FUS<sup>S57Δ</sup>; *acdh-10(syb1928)* on HA-114 n=421.

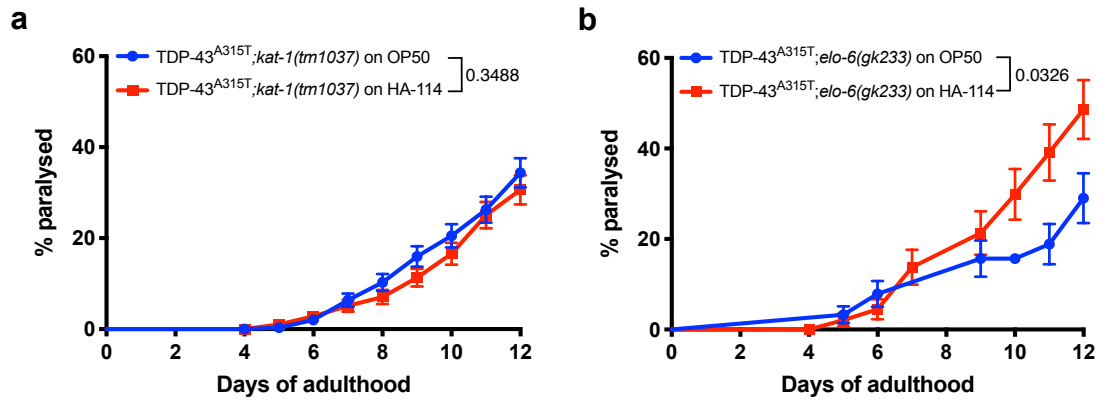

**Supplementary figure 9. *kat-1* and *elo-6* are essential for neuroprotection provided by HA-114 in TDP-43<sup>A315T</sup> ALS model.** Transgenics were monitored from the adult stage, scored daily for paralysis. Deletion of *kat-1* (a) and *elo-6* (b) altered the beneficial effect of HA-114. For paralysis assays, curves were generated and compared using the log-rank (Mantel–Cox) test. Panel a: TDP-43<sup>A315T</sup>; *kat-1(tm1037)* on OP50 n=308; TDP-43<sup>A315T</sup>; *kat-1(tm1037)* on HA-114 n=295. Panel b: TDP-43<sup>A315T</sup>; *elo-6(gk233)* on OP50 n=92; TDP-43<sup>A315T</sup>; *elo-6(gk233)* on HA-114 n=102.

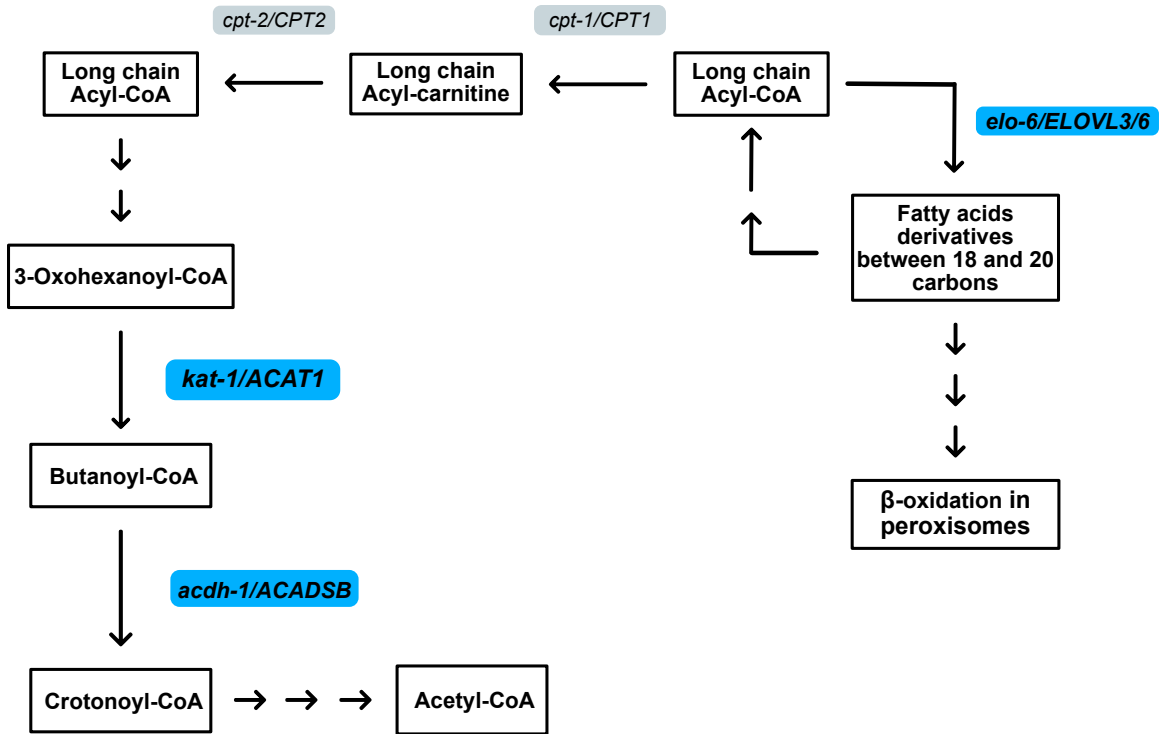

**Supplementary figure 10. Simplified pathway of fatty acids metabolism and  $\beta$ -oxidation in *C. elegans* and *H. sapiens*.** Enzymes names are enclosed in rounded rectangles. *acdh-1/ACADSB*: Acyl CoA dehydrogenase; *cpt-1/CPT1*: carnitine palmitoyl transferase 1; *cpt-2/CPT2* : carnitine palmitoyl transferase 2; *elo-6/ELOVL3/6*: fatty acid elongase 3/6; *kat-1/ACAT1*: 3-Ketoacyl-coA thiolase.

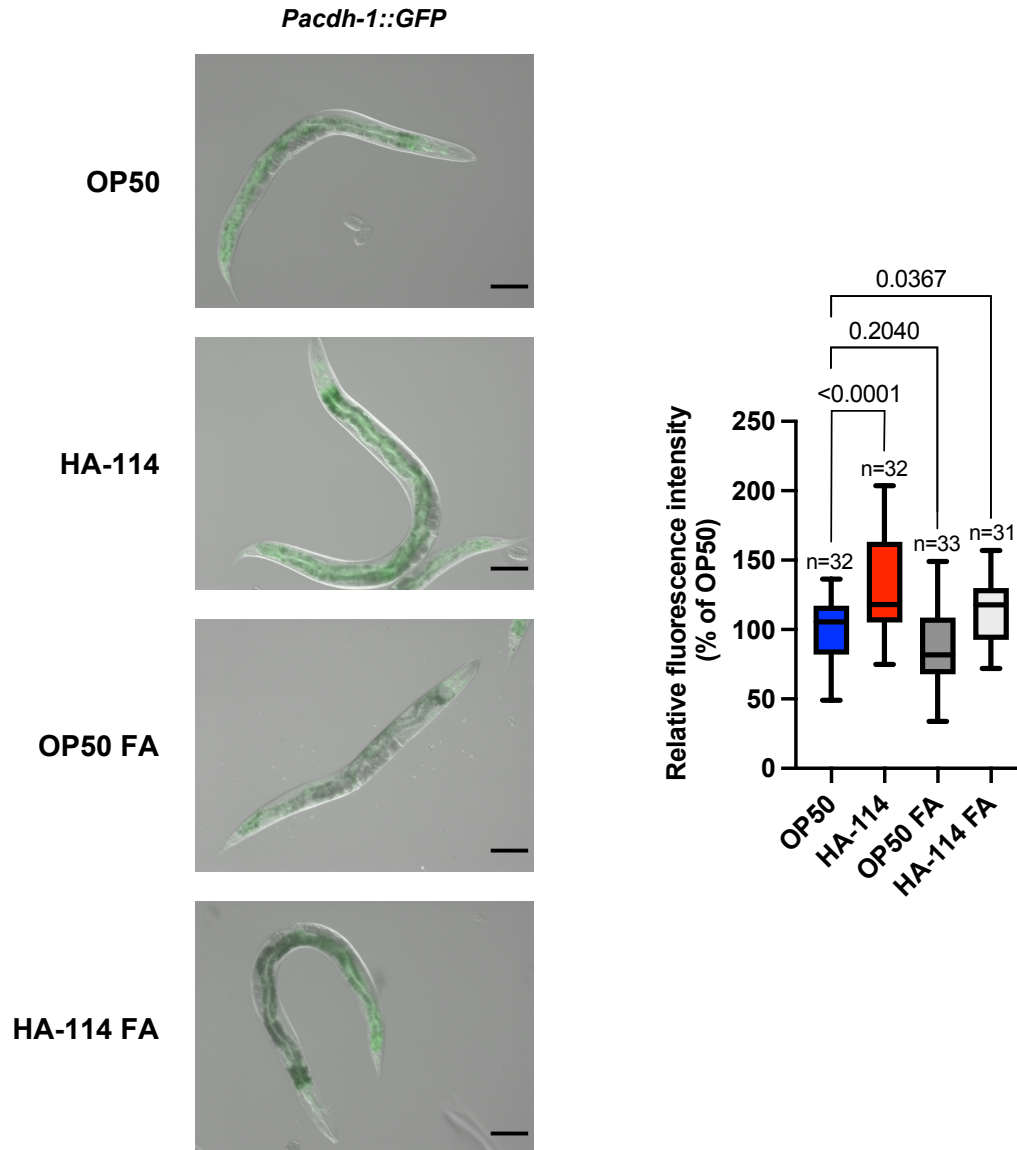

**Supplementary figure 11. *acdH-1* is activated by HA-114' fatty acids.** Worms were fed with either OP50, HA-114 or a mix of OP50 and fatty acids, extracted from OP50 or HA-114, for 24h before analysis. Fatty acids from OP50 did not affect GFP expression of the *Pacdh-1::GFP* reporter strain, while HA-114' fatty acids were enough to increased GFP signal. For fluorescence quantification, one-way ANOVA were performed, and *n* are indicated in the figure. Scale bar = 100  $\mu$ m. For boxplots, minimum, first quartile, median, third quartile, and maximum are shown.



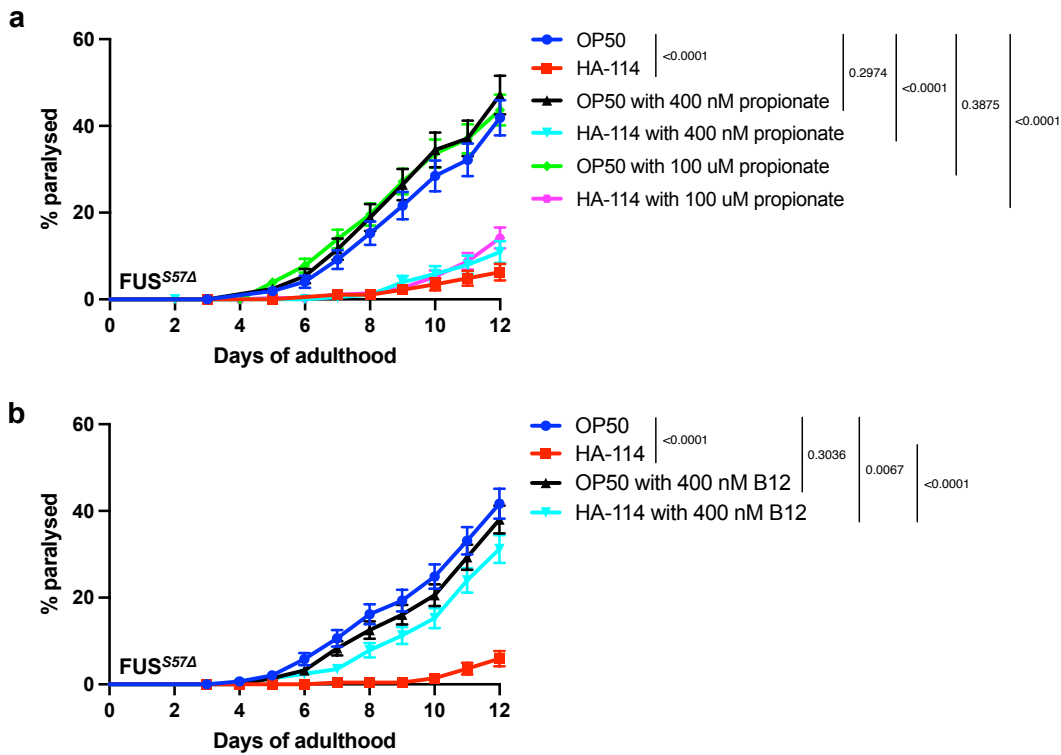

**Supplementary figure 12. Modulating *acdH-1* pathway partially affects HA-114 neuroprotective effect.** Transgenics were monitored from the adult stage, scored daily for paralysis. (a) Supplementation of propionate does not rescue paralysis phenotype in  $FUS^{S57\Delta}$  worms. Combination of HA-114 and propionate does not cause propionate toxicity in these animals. (b) Vitamin B12 supplementation prevent HA-114 to have its neuroprotective effect, but does not exacerbate paralysis phenotype in OP50 fed worms. For paralysis assays, curves were generated and compared using the log-rank (Mantel–Cox) test. Panel a: OP50 n=211; HA-114 n=208; OP50 with 400nM propionate n=212; HA-114 with 400nM propionate n=211; OP50 with 100uM propionate n=317; HA-114 with 100uM propionate n=290. Panel c: OP50 n=314; HA-114 n=262; OP50 with 400nM B12 n=300; HA-114 with 400nM B12 n=299.

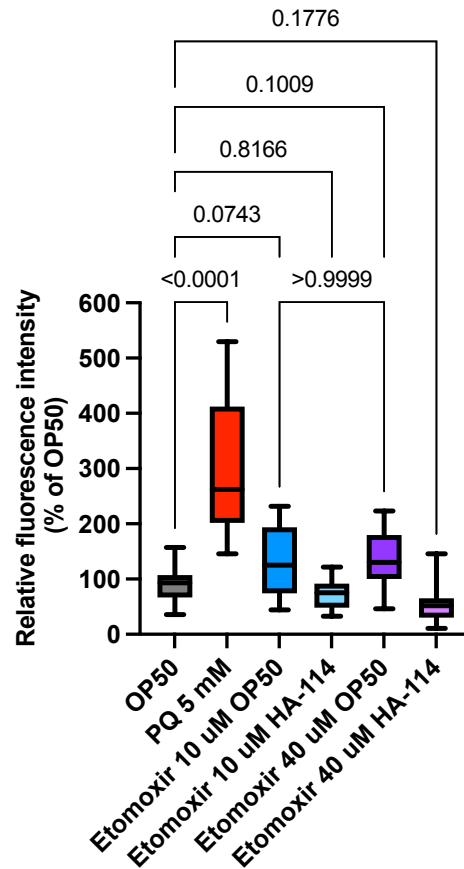

**Supplementary figure 13. Etomoxir does not cause oxidative stress in *C. elegans*.** Transgenics were treated with Etomoxir for 24h before analysis. Etomoxir does not significantly increase *hsp-6::GFP* signal, on either OP50 or HA-114 diet. For fluorescence quantification, one-way ANOVA was performed. OP50 n=30, PQ 5mM n=27, Etomoxir 10uM on OP50 n=29, Etomoxir 10uM on HA-114 n=29, Etomoxir 40uM on OP50 n=28, Etomoxir 40uM on HA-114 n=29. For boxplots, minimum, first quartile, median, third quartile, and maximum are shown.

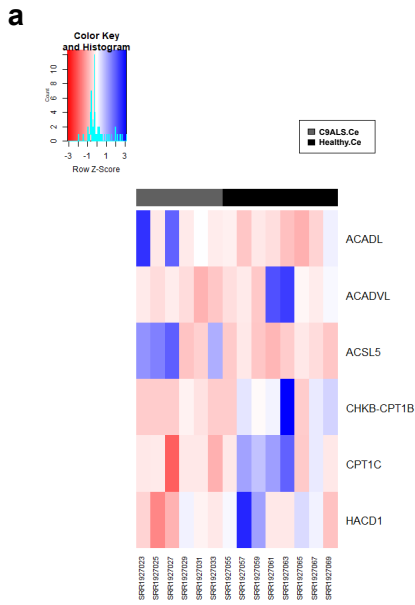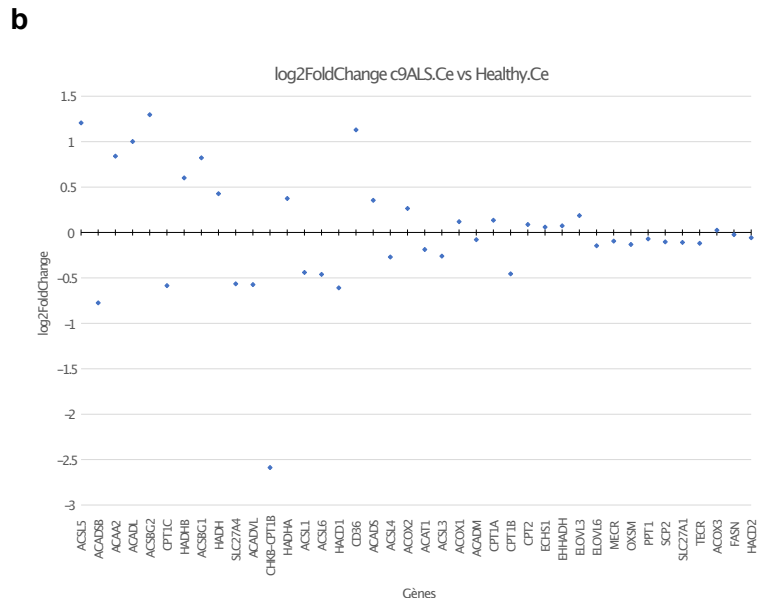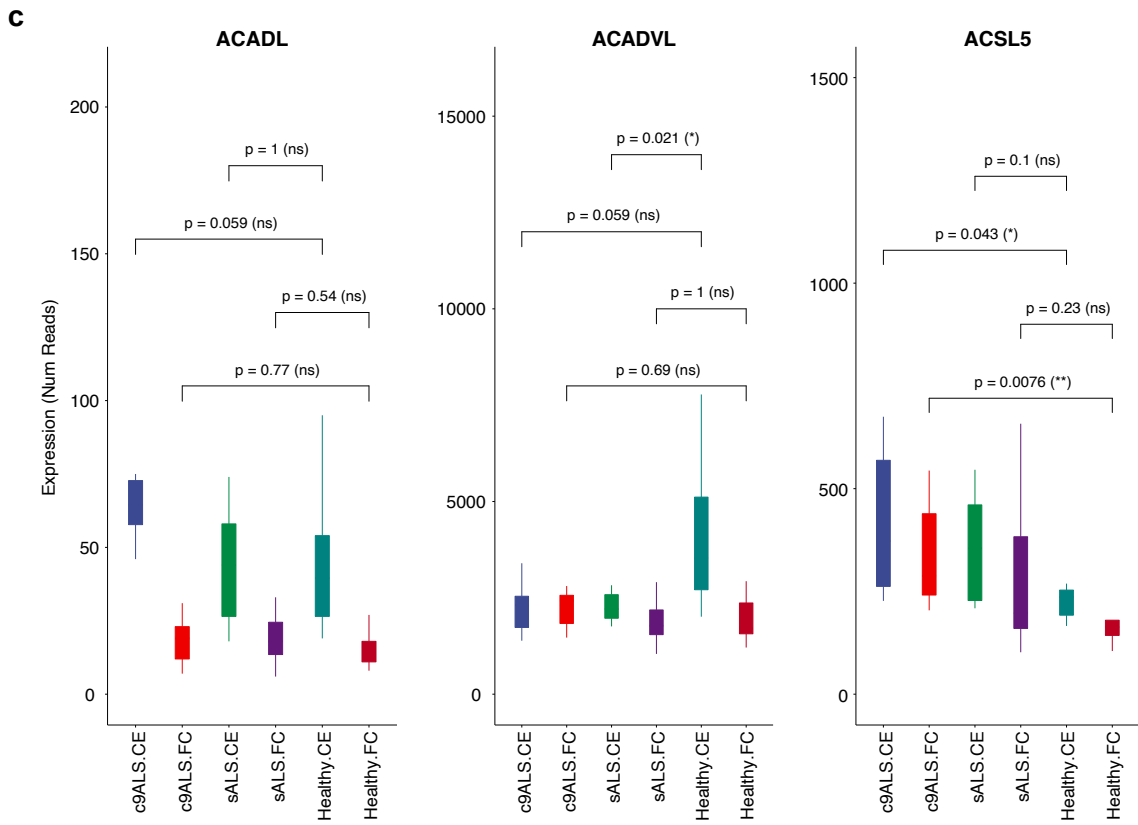

**Supplementary figure 14: Genes associated with  $\beta$ -oxidation are differentially expressed in the cerebellum and the frontal cortex of c9ALS patients.** (a) Differentially expressed genes associated with the  $\beta$ -oxidation pathway between *C9orf72* ALS patients and healthy individuals were plotted as heatmap. Red indicates low relative expression and blue indicates high relative expression. (b) Log<sub>2</sub> Fold change of differentially expressed genes associated with the  $\beta$ -oxidation pathway between *C9orf72* ALS patients and healthy individuals. (c) *ACADL* expression is upregulated in the cerebellum of c9ALS and *ACADVL* is downregulated in c9ALS and sALS cerebellum. Interestingly, *ACSL5* expression is upregulated in the cerebellum and the frontal cortex of c9ALS. Data: GEO accession: GSM1642314; SRA study: SRP056477. For boxplots, minimum, first quartile, third quartile, and maximum are shown.

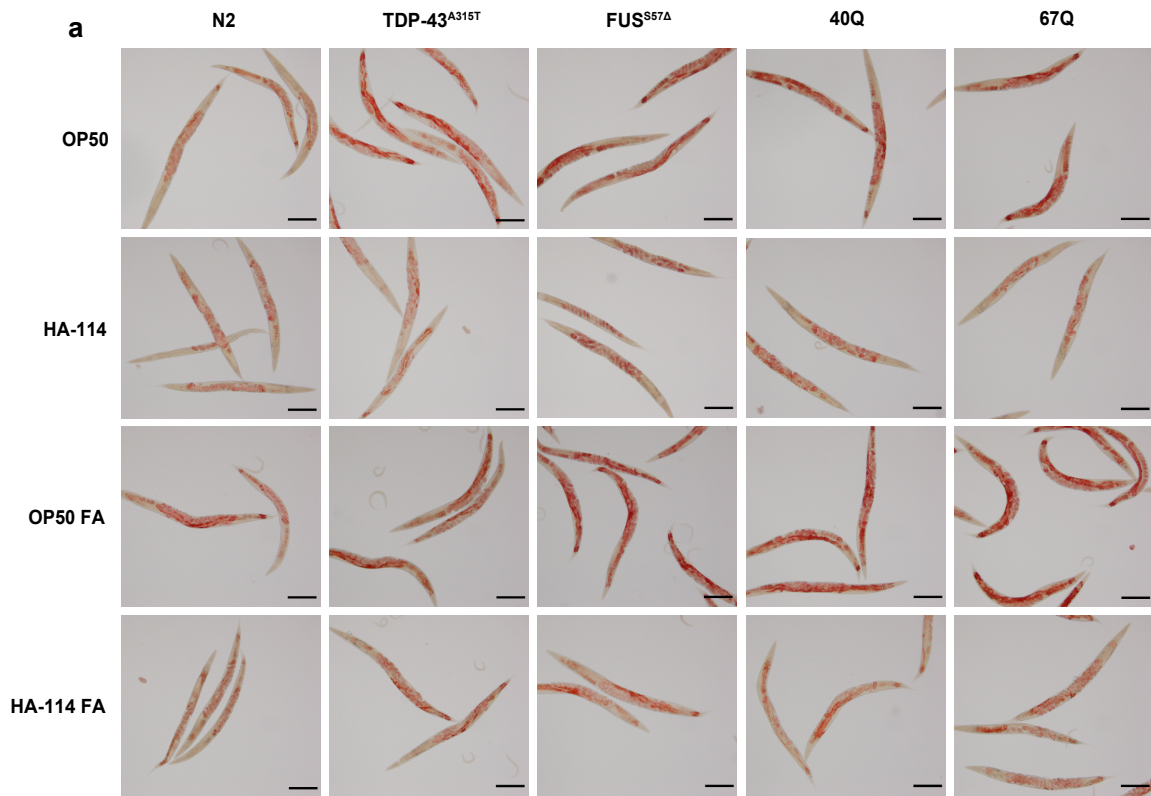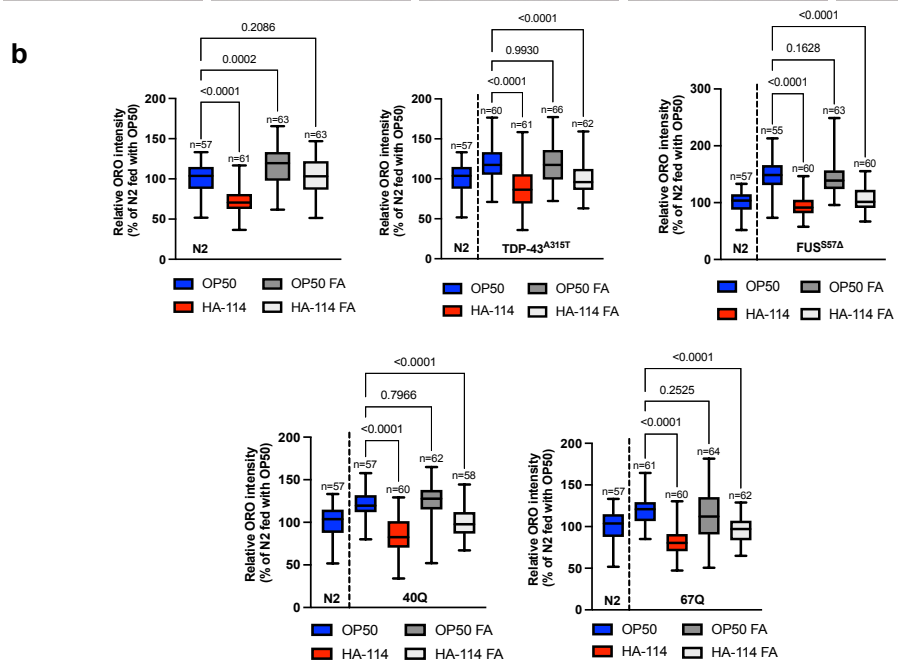

**Supplementary figure 15. Fatty acids from HA-114 modulate lipid accumulation in worm age-dependent neurodegeneration models.** (a) Representative images of worms fed with OP50, *L. rhamnosus* HA-114, fatty acids from OP50 or fatty acids from HA-114 and stained with Oil Red O. N2 worms show a basal level of lipid accumulation. (b) Quantification of Oil Red O show same levels of fat accumulation in worms expressing FUS<sup>S57Δ</sup>, TDP-43<sup>A315T</sup>, and polyQ expansion (40Q and 67Q) when fed with either OP50 or fatty acid extract from OP50. Worms fed with fatty acids from HA-114 showed a significant decrease of lipid accumulation. For the Oil Red O quantification graphs (panel b), one-way ANOVA were performed and *n* are indicated in the figure. Scale bar = 100 μm. For boxplots, minimum, first quartile, median, third quartile, and maximum are shown.

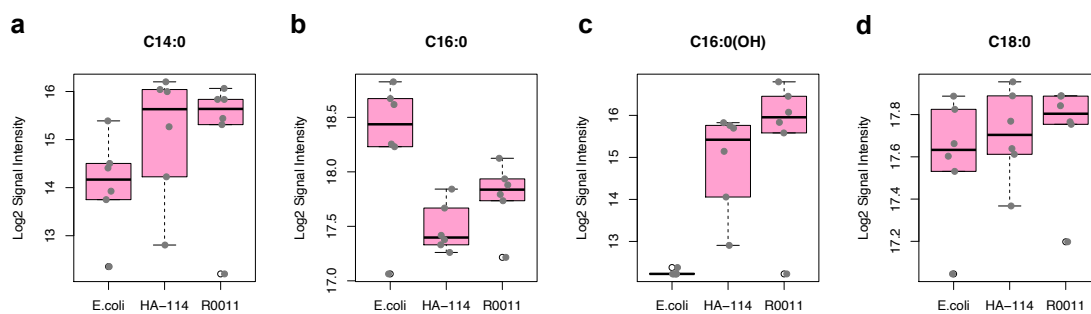

**Supplementary figure 16. Free fatty acids (FFA) annotated from OP50, HA-114 and R0011 bacterial strains.** Log<sub>2</sub> signal intensity from (a) C14:0 myristic acid (HA-114 vs OP50  $p=0.1618594$ ; R0011 vs OP50  $p=0.1730919$ ; HA-114 vs R0011  $p=0.8966804$ ), (b) C16:0 palmitic acid (HA-114 vs OP50  $p=0.01408153$ ; R0011 vs OP50  $p=0.11738097$ ; HA-114 vs R0011  $p=0.0840674$ ), (c) C16:0(OH) hydroxypalmitic acid (HA-114 vs OP50  $p=0.0002694804$ ; R0011 vs OP50  $p=0.0007397631$ ; HA-114 vs R0011  $p=0.391468$ ), (d) C18:0 stearic acid (HA-114 vs OP50  $p=0.5338358$ ; R0011 vs OP50  $p=0.4425402$ ; HA-114 vs R0011  $p=0.901340$ ). For lipidomics analysis,  $n=6$  for each bacterial strain. Raw data and untargeted lipidomic results analysis are available in Supplementary Data 1 and 2. For boxplots, minimum, first quartile, median, third quartile, maximum and each data point are shown.

| Gene            | log <sub>2</sub> (Fold Change) | -log <sub>10</sub> (p-value) | Gene              | log <sub>2</sub> (Fold Change) | -log <sub>10</sub> (p-value) |
|-----------------|--------------------------------|------------------------------|-------------------|--------------------------------|------------------------------|
| <i>comt-4</i>   | 9.87862663394132               | 99.7453109                   | <i>T07G12.5</i>   | 6.60805071963761               | 27.6992845                   |
| <i>fmo-2</i>    | 9.54793672826199               | 43.6786685                   | <i>Y40B10A.10</i> | 6.55437120438937               | 9.83497546                   |
| <i>col-37</i>   | 8.09882592083367               | 23.6043977                   | <i>clec-101</i>   | 6.53234125111637               | 15.4291571                   |
| <i>col-51</i>   | 7.99974875772954               | 16.5212658                   | <i>cyp-14A4</i>   | 6.47819223000637               | 17.2524927                   |
| <i>scl-12</i>   | 7.77678012343102               | 13.627124                    | <i>clec-60</i>    | 6.46941490655043               | 21.5608881                   |
| <b>ZK355.8</b>  | 7.72806356442673               | 24.2158052                   | <i>grl-23</i>     | 6.45038706815409               | 16.1948104                   |
| <i>nlp-39</i>   | 7.70628621197532               | 41.4471206                   | <i>W02D7.11</i>   | 6.40679336017293               | 10.5975775                   |
| <i>scl-13</i>   | 7.64237045387068               | 12.5438689                   | <i>col-35</i>     | 6.38208805437359               | 16.3087854                   |
| <i>mtl-1</i>    | 7.63840864172396               | 73.3528053                   | <i>col-36</i>     | 6.36194387462439               | 14.6750336                   |
| <b>C54C8.12</b> | 7.58426311128764               | 30.6444151                   | <i>Y57E12B.11</i> | 6.35114125562006               | 8.84129742                   |
| <i>spp-20</i>   | 7.57758760470988               | 21.0188592                   | <i>Y73B6BL.37</i> | 6.33850300181293               | 14.6128333                   |
| <i>col-2</i>    | 7.45257342787137               | 19.8318924                   | <i>col-108</i>    | 6.29215024624157               | 12.7314131                   |
| <i>col-185</i>  | 7.32752273324769               | 16.5394412                   | <i>Y50E8A.19</i>  | 6.24646404668113               | 11.6861425                   |
| <b>ZK355.3</b>  | 7.27234875958693               | 18.9184428                   | <i>lipl-3</i>     | 6.1771018660647                | 22.7659395                   |
| <i>col-50</i>   | 7.09906776970553               | 13.0342336                   | <i>M6.11</i>      | 6.13593697212128               | 9.97317931                   |
| <i>scl-11</i>   | 6.92409948853672               | 9.99911968                   | <i>ttr-19</i>     | 6.06718786890319               | 8.88081259                   |
| <i>col-85</i>   | 6.90911404977131               | 17.2538545                   | <i>Y57E12B.4</i>  | 6.01948735106341               | 13.5724462                   |
| <i>col-183</i>  | 6.83294309056956               | 28.6669326                   | <i>grl-20</i>     | 5.99933755902934               | 12.3038485                   |
| <i>grl-25</i>   | 6.75068617466407               | 16.5134975                   | <i>smf-3</i>      | 5.98431945049091               | 37.4449756                   |
| <i>col-44</i>   | 6.69878248210145               | 18.0031516                   | <i>C13A2.12</i>   | 5.95549751109163               | 9.2819474                    |
| <i>cut-1</i>    | 6.65779636590876               | 13.9896961                   | <i>gst-19</i>     | 5.94282889293229               | 12.789848                    |
| <i>col-40</i>   | 6.64994189406571               | 19.6592105                   | <i>F20E11.17</i>  | 5.93693818626582               | 11.7431324                   |
| <i>col-102</i>  | 6.63923155878408               | 13.4238371                   | <i>col-84</i>     | 5.88220338126241               | 11.4107272                   |
| <i>col-123</i>  | 6.63889601447437               | 13.4320701                   | <i>col-164</i>    | 5.88053302510974               | 9.39537277                   |
| <b>F57F4.2</b>  | 6.61010243445913               | 12.0319099                   | <i>col-114</i>    | 5.83481063285872               | 13.0582472                   |

**Supplementary Table 1: List of upregulated genes in N2 worms fed with HA-114 (compared to OP50)**



| Gene             | log2 (Fold Change) | -log10 (p-value) | Gene                | log2 (Fold Change) | -log10 (p-value) |
|------------------|--------------------|------------------|---------------------|--------------------|------------------|
| <b>D1014.6</b>   | -6.58130429443456  | 7.59723595       | <i>H31G24.1</i>     | -3.36110423381441  | 4.99501892       |
| <b>cyp-35A3</b>  | -5.26971806442959  | 9.8943547        | <i>T26C11.3</i>     | -3.35994858567097  | 2.10186277       |
| <b>T20H9.6</b>   | -4.77232062732769  | 4.86362304       | <i>F49F1.8</i>      | -3.34030650862598  | 2.68831392       |
| <b>Y38H6C.23</b> | -4.39581701915455  | 5.76033539       | <i>F36F12.3</i>     | -3.32218550668426  | 2.66452973       |
| <b>acdH-1</b>    | -4.27824066606366  | 7.77503269       | <i>mltn-3</i>       | -3.30974507153072  | 4.11888428       |
| <b>T24D5.5</b>   | -4.27376263570936  | 4.90651812       | <i>K08F11.6</i>     | -3.29922845314491  | 11.3203483       |
| <b>nspe-7</b>    | -3.95673616454527  | 8.85512815       | <i>clec-247</i>     | -3.28672949400989  | 1.90351031       |
| <b>Y32G9A.11</b> | -3.95309359571931  | 2.82279758       | <i>cutl-7</i>       | -3.27955819396815  | 8.02778931       |
| <b>cyp-35A4</b>  | -3.92865080818664  | 8.17889876       | <i>ferl-1</i>       | -3.27206188596272  | 2.3889255        |
| <b>F02H6.1</b>   | -3.91853525687342  | 10.7321835       | <i>C04G6.6</i>      | -3.24534306851372  | 5.46675923       |
| <b>F32A11.5</b>  | -3.84827550994329  | 6.88243496       | <i>Y49E10.26</i>    | -3.22848634462104  | 9.89937162       |
| <b>mboa-5</b>    | -3.78653834654188  | 2.90612659       | <i>C44C10.5</i>     | -3.20163254992974  | 4.60563122       |
| <b>B0554.4</b>   | -3.77878513898639  | 4.47307032       | <i>dot-1.5</i>      | -3.16513176281623  | 4.52525103       |
| <b>C09G12.17</b> | -3.74519597364298  | 2.56419407       | <i>B0250.11</i>     | -3.15152606307824  | 1.95390021       |
| <b>oac-42</b>    | -3.7161674910615   | 3.10876041       | <i>Y105C5B.1420</i> | -3.14592437731143  | 1.79352711       |
| <b>F18A12.7</b>  | -3.66831246728887  | 9.02666446       | <i>C04E12.10</i>    | -3.1214471921964   | 2.75762216       |
| <b>ZC84.1</b>    | -3.63205853382885  | 5.36165306       | <i>Y47G6A.15</i>    | -3.11295496938544  | 12.9674724       |
| <b>B0554.2</b>   | -3.61046784466151  | 2.26374503       | <i>bath-23</i>      | -3.08795367996044  | 3.29868589       |
| <b>C04G6.13</b>  | -3.57846422518453  | 2.3533466        | <i>cutl-6</i>       | -3.0868579702075   | 5.95140556       |
| <b>nas-15</b>    | -3.55399028351787  | 9.5448918        | <i>F52G3.3</i>      | -3.08053730032058  | 1.78710001       |
| <b>ZK218.1</b>   | -3.50723405639355  | 2.38502544       | <i>Y49E10.30</i>    | -3.05917236626404  | 3.62565075       |
| <b>F16H6.4</b>   | -3.49646819274977  | 2.20961034       | <i>Y44A6B.3</i>     | -3.04303932102096  | 3.02291594       |
| <b>col-148</b>   | -3.473671185875    | 5.30595715       | <i>gcy-18</i>       | -3.02977374072766  | 4.67264013       |
| <b>C32H11.6</b>  | -3.41679538726944  | 3.1785791        | <i>C06A1.7</i>      | -3.02194395846066  | 1.80489206       |
| <b>F22H10.4</b>  | -3.38583404474747  | 2.33439917       | <i>Y20F4.8</i>      | -3.01879749443978  | 3.73066234       |

**Supplementary Table 2: List of downregulated genes in N2 worms fed with HA-114 (compared to OP50)**

| Gene            | log2 (Fold Change) | -log10 (p-value) | Gene              | log2 (Fold Change) | -log10 (p-value) |
|-----------------|--------------------|------------------|-------------------|--------------------|------------------|
| <i>fmo-2</i>    | 8.70956706         | 30.80558353      | <i>cnc-11</i>     | 6.07894161         | 12.10115523      |
| <i>ilys-3</i>   | 8.4244723          | 22.97385399      | <i>C18H7.1</i>    | 6.04949025         | 10.2658901       |
| <i>lipl-3</i>   | 8.04282975         | 33.90639009      | <i>fbxa-24</i>    | 6.0220537          | 12.96771729      |
| <b>C54C8.12</b> | 7.58490125         | 27.87428669      | <i>Y73B6BL.37</i> | 5.97947893         | 11.71166751      |
| <i>ilys-2</i>   | 7.46101799         | 17.66153356      | <i>hsp-16.41</i>  | 5.96168784         | 36.75574214      |
| <i>nlp-39</i>   | 7.32972011         | 33.10588398      | <i>F49H6.5</i>    | 5.95512499         | 19.99147225      |
| <b>W02D7.11</b> | 7.26688977         | 11.98340288      | <i>C08F1.8</i>    | 5.94529945         | 9.509269995      |
| <i>clec-60</i>  | 7.2261522          | 22.32029752      | <i>cyp-33C1</i>   | 5.91201039         | 6.673025068      |
| <i>clx-1</i>    | 7.13852843         | 10.76526756      | <i>acs-2</i>      | 5.88214796         | 32.50578365      |
| <b>F40G12.5</b> | 6.73873737         | 15.29875601      | <i>Y46H3A.5</i>   | 5.74813101         | 6.115619855      |
| <b>F57G4.11</b> | 6.71539844         | 16.36843041      | <i>Y53G8AM.5</i>  | 5.73195427         | 18.30334685      |
| <b>W08A12.4</b> | 6.63368495         | 12.2906029       | <i>H39E23.3</i>   | 5.73052693         | 14.38396695      |
| <b>T22F3.11</b> | 6.56892797         | 19.87494156      | <i>ZK971.1</i>    | 5.72632025         | 11.51830638      |
| <i>spp-20</i>   | 6.50670072         | 14.56788288      | <i>F07C4.12</i>   | 5.70130533         | 15.5649083       |
| <i>tts-1</i>    | 6.37615852         | 37.09018362      | <i>E02H4.4</i>    | 5.67989988         | 25.00699877      |
| <i>rab-11.2</i> | 6.34038243         | 10.66537805      | <i>fbxa-165</i>   | 5.66322171         | 12.54398774      |
| <i>dod-21</i>   | 6.26681417         | 12.48657479      | <i>Y57E12B.11</i> | 5.65483204         | 6.497716389      |
| <i>lys-10</i>   | 6.22140365         | 11.37483603      | <i>W03F9.4</i>    | 5.65472041         | 35.29341093      |
| <i>mtl-1</i>    | 6.22053905         | 40.89787225      | <i>Y60C6A.2</i>   | 5.64772622         | 6.738652939      |
| <b>F46A8.13</b> | 6.19936449         | 19.22317505      | <i>scl-11</i>     | 5.60865357         | 6.147619693      |
| <i>thn-1</i>    | 6.18271149         | 15.73992935      | <i>T07G12.5</i>   | 5.58558481         | 17.13924825      |
| <i>hsp-16.2</i> | 6.18204413         | 39.29514003      | <i>srg-31</i>     | 5.57982942         | 21.43650861      |
| <b>F08H9.3</b>  | 6.14357275         | 13.05352608      | <i>sodh-1</i>     | 5.56438661         | 42.50494404      |
| <i>irld-36</i>  | 6.14111929         | 7.137245121      | <i>C44H9.2</i>    | 5.55996121         | 7.192404706      |
| <i>ugt-18</i>   | 6.1360785          | 32.57612213      | <i>ins-8</i>      | 5.53446772         | 5.211344066      |

Supplementary Table 3: List of upregulated genes in N2 worms fed with B94 (compared to OP50)

| Gene             | log2 (Fold Change) | -log10 (p-value) | Gene            | log2 (Fold Change) | -log10 (p-value) |
|------------------|--------------------|------------------|-----------------|--------------------|------------------|
| <i>fipr-18</i>   | -7.3899051         | 17.8629289       | <i>ssp-19</i>   | -5.9031358         | 15.8683656       |
| <i>C16C8.19</i>  | -6.7450299         | 13.5896424       | <i>K02B12.6</i> | -5.8777989         | 13.4207461       |
| <i>F49C5.11</i>  | -6.6720748         | 14.3588193       | <i>fipr-20</i>  | -5.8562662         | 17.7295597       |
| <i>D1014.6</i>   | -6.5833517         | 7.60330179       | <i>fis-1</i>    | -5.8136158         | 9.37802511       |
| <i>Y39B6A.9</i>  | -6.5445814         | 22.4913188       | <i>bli-1</i>    | -5.8095208         | 37.7755119       |
| <i>misp-71</i>   | -6.4031816         | 11.5842834       | <i>ZK970.8</i>  | -5.780491          | 11.5692106       |
| <i>R01E6.5</i>   | -6.3793551         | 10.775615        | <i>K08C9.1</i>  | -5.768231          | 13.9929598       |
| <i>T16G12.10</i> | -6.349873          | 22.5070685       | <i>scl-7</i>    | -5.763782          | 13.9937634       |
| <i>ZK1025.3</i>  | -6.310217          | 10.7349212       | <i>C05B5.11</i> | -5.7464197         | 23.005554        |
| <i>K12H6.8</i>   | -6.2913412         | 11.8767872       | <i>F25C8.1</i>  | -5.741145          | 12.6612795       |
| <i>T26E3.6</i>   | -6.2636633         | 11.3583125       | <i>col-138</i>  | -5.7397982         | 24.6828362       |
| <i>F46B6.13</i>  | -6.255397          | 15.0117974       | <i>R09H10.6</i> | -5.7367796         | 12.0214734       |
| <i>F26D10.13</i> | -6.2547035         | 17.8234353       | <i>rol-1</i>    | -5.7045872         | 24.3361006       |
| <i>Y102E9.6</i>  | -6.2251704         | 8.86862954       | <i>C48B4.12</i> | -5.6782743         | 21.3184496       |
| <i>R03H10.4</i>  | -6.1527173         | 11.2609968       | <i>C09G12.5</i> | -5.671836          | 16.7723887       |
| <i>clec-99</i>   | -6.1141736         | 17.631972        | <i>col-49</i>   | -5.6509951         | 11.8762189       |
| <i>fipr-28</i>   | -6.0860342         | 15.5071309       | <i>M176.10</i>  | -5.6425164         | 15.1383091       |
| <i>F43C11.2</i>  | -6.0760143         | 13.5530852       | <i>C16C8.7</i>  | -5.6337892         | 11.7216452       |
| <i>fipr-19</i>   | -6.0407717         | 10.2289594       | <i>try-8</i>    | -5.6258549         | 26.8288941       |
| <i>tag-329</i>   | -6.0305397         | 25.8986167       | <i>K12H6.4</i>  | -5.6134512         | 20.0022469       |
| <i>clec-207</i>  | -5.9805215         | 21.875854        | <i>clec-219</i> | -5.6047092         | 21.0832096       |
| <i>clec-208</i>  | -5.9653792         | 22.9368451       | <i>F18E9.7</i>  | -5.5864444         | 22.5636954       |
| <i>cutl-7</i>    | -5.9623714         | 12.0496394       | <i>F35E12.5</i> | -5.5700749         | 69.0611886       |
| <i>R11G10.4</i>  | -5.9192587         | 13.2498415       | <i>col-110</i>  | -5.5656775         | 35.1928499       |
| <i>bli-2</i>     | -5.9096492         | 26.5864057       | <i>K03D3.5</i>  | -5.559995          | 17.0099999       |

**Supplementary Table 4: List of downregulated genes in N2 worms fed with B94 (compared to OP50)**

| <b>Gene</b>         | <b>Forward</b>            | <b>Reverse</b>          |
|---------------------|---------------------------|-------------------------|
| <i>kat-1</i>        | GCCCGTACACCTATTGGATC      | CTTCTGGTCCGATATTTCCA    |
| <i>acdh-1</i>       | TCCAGCTAATGGGTGTTTCATG    | GTGCCTGTGGTGTTCCTAC     |
| <i>elo-6</i>        | GACTCACATCGCATTCTGG       | GAGACTTGTACCTTGTACCCA   |
| <i>aak-2</i>        | CCTGGCAACACCATAAGCTG      | CAGGGTTCCACAAAGAAGTG    |
| <i>daf-16</i>       | TCTCCTCCTGTGTGCCTTCC      | CTTTATCCTCTTCTTGGCTCCG  |
| <i>sir-2.1</i>      | ACTTCTGGTCGTCTTCTTCG      | CTTTCGCAATGTGTCTCGTG    |
| <i>hsf-1</i>        | AATCCTCGGCTCCATCATAATTCG  | CAGCCGCAACAAGACTATTCG   |
| <i>acs-20</i>       | GAGGAACCTCTACACCATAAACAG  | CCTTCTGATCGTATGTACGTCTC |
| <i>acdh-10</i>      | ATCTTCCAAATCTACGAGGG      | TTCACAATGAGGGCAGTCT     |
| Human <i>TARDBP</i> | GTCTCTTTGTGGAGAGGACTTGATC | GGTTTGGCTCCCTCTGCATG    |
| Human <i>FUS</i>    | ATGGCCTCAAACGATTATAC      | GATTATAGCTTTGCTGCTGT    |

**Supplementary Table 5: List of oligo sequences used for genotyping**
